# Supplementary material
Source: publisher site journal article supplement (https://www.dovepress.com/article/544734)
Supplement: Supplementary file 1 [file 544734%20Supplementary%20Table%201.docx]

# Supplementary Table 1. STROBE checklist for this cohort study

| Item No. | Recommendation | Section of manuscript where item is reported |
| --- | --- | --- |
| 1 | Indicate the study design with a commonly used term in the title or the abstract | Title, Abstract |
| 2 | Provide in the abstract an informative and balanced summary of what was done and what was found | Abstract |
| 3 | Explain the scientific background and rationale for the investigation being reported | Background (Introduction, p.2–3) |
| 4 | State specific objectives, including any prespecified hypotheses | Background (end), Introduction (p.3) |
| 5 | Describe the setting, locations, and relevant dates, including periods of recruitment, exposure, follow-up, and data collection | Methods 2.1 (Study design, setting, population) |
| 6a | Give the eligibility criteria, and the sources and methods of selection of participants. Describe methods of follow-up | Methods 2.1 (p.4–5), Results 3.1 (Participant selection) |
| 6b | For matched studies, give matching criteria and number of exposed and unexposed | Not applicable |
| 7 | Clearly define all outcomes, exposures, predictors, potential confounders, and effect modifiers. Give diagnostic criteria, if applicable | Methods 2.2 (KCL definition of frailty states, predictors) |
| 8 | For each variable of interest, give sources of data and details of methods of assessment (measurement). Describe comparability of assessment methods if there is more than one group | Methods 2.2 (KCL items, scoring), 2.3 (statistical analysis) |
| 9 | Describe any efforts to address potential sources of bias | Methods 2.3 (multivariable models, sensitivity analysis), Discussion (limitations) |
| 10 | Explain how the study size was arrived at | Results 3.1 (eligible participants, flow diagram, follow-up rate) |
| 11 | Explain how quantitative variables were handled in the analyses. If applicable, describe which groupings were chosen, and why | Methods 2.3 (categorization of KCL scores; logistic regression approach) |
| 12a | Describe all statistical methods, including those used to control for confounding | Methods 2.3 (stepwise logistic regression, sensitivity analyses) |
| 12b | Describe any methods used to examine subgroups and interactions | Methods 2.3 (transition-specific dependent variables, subgroup analyses) |
| 12c | Explain how missing data were addressed | Results 3.1 (omissions excluded, 358 final participants) |
| 12d | If applicable, explain how loss to follow-up was addressed | Results 3.1 (80.6% follow-up rate described) |
| 12e | Describe any sensitivity analyses | Methods 2.3 (sensitivity analysis), Results 3.1 (similar results) |
| 13a | Report numbers of individuals at each stage of study | Results 3.1 (n=591 → 476 → 444 → 372 → 358), Figure 2 |
| 13b | Give reasons for non-participation at each stage | Results 3.1 (non-return, omissions) |
| 13c | Consider use of a flow diagram | Figure 2 |
| 14a | Give characteristics of study participants (demographic, social, etc.) and information on exposures/potential confounders | Results 3.1, Table 1 |
| 14b | Indicate number of participants with missing data for each variable of interest | Table 1 footnote (if specified), Results (omissions excluded) |
| 14c | Summarise follow-up time (average and total) | Results 3.1 (6-year follow-up, 2016–2022) |
| 15 | Report numbers of outcome events or summary measures over time | Results 3.1 (prevalence changes, chi-square, logistic regression outputs) |
| 16a | Give unadjusted and adjusted estimates and their precision (95% CI). Make clear which confounders were adjusted for and why | Results (Tables 2 & 11, ORs, CIs), Methods 2.3 |
| 16b | Report category boundaries when continuous variables were categorized | Methods 2.2 (robust=0–3, pre-frail=4–7, frail≥8) |
| 16c | If relevant, consider translating estimates into absolute risk | Not applicable (frailty transitions, ORs reported) |
| 17 | Report other analyses done—e.g., subgroups, interactions, sensitivity analyses | Results 3.1 (sensitivity analysis), Discussion |
| 18 | Summarise key results with reference to study objectives | Discussion (first paragraph, main findings restated) |
| 19 | Discuss limitations of the study | Discussion (limitations section) |
| 20 | Give a cautious overall interpretation of results considering objectives, limitations, multiplicity of analyses, and evidence | Discussion & Conclusions |
| 21 | Discuss the generalisability (external validity) of the study results | Discussion (generalizability to other populations) |
| 22 | Give the source of funding and the role of funders | Declarations: Funding |
